# Supplementary material for: Individual-Level Lesion-Network Mapping to Visualize the Effects of a Stroke Lesion on the Brain Network: Connectograms in Stroke Syndromes
Source: PubMed Central journal article supplement — J Clin Neurol. 2019 Dec 30;16(1):116–23. doi: 10.3988/jcn.2020.16.1.116 (PMC6974837; doi:10.3988/jcn.2020.16.1.116), 2019-12-30
Supplement: jcn-16-116-s001.pdf [file jcn-16-116-s001.pdf]

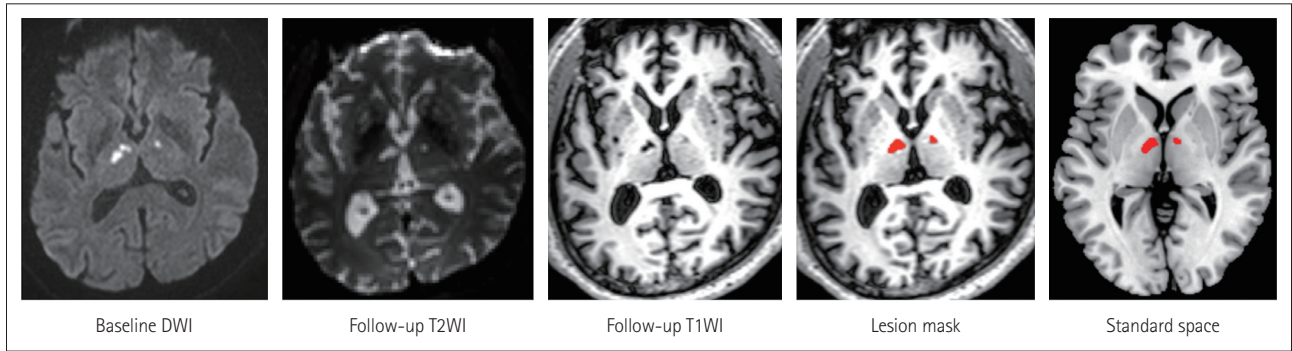

**Supplementary Fig. 1.** Representative case of lesion mask. For image preprocessing, we visually delineated the acute stroke lesions in DWIs obtained at the time of admission and superimposed the lesion mask on the volumetric T1WIs acquired 3 months after stroke using MRICron software. These lesion masks were used for the subsequent image preprocessing for volume reconstruction. DWI: diffusion-weighted image, T1WI: T1-weighted image, T2WI: T2-weighted image.
